# Supplementary material
Source: ML conference proceedings conference paper supplement (https://proceedings.neurips.cc/paper_files/paper/2010/hash/e5f6ad6ce374177eef023bf5d0c018b6-Abstract.html)
Supplement: Supplementary file 1 [file e5f6ad6ce374177eef023bf5d0c018b6-Supplemental.zip]

Archive with 1 entries (1 files):
- extra/NIPS2010_0573_extra.pdf
